# Supplementary material for: A Mouse Model for Imprinting of the Human Retinoblastoma Gene
Source: PubMed Central journal article supplement (PMC4537222; doi:10.1371/journal.pone.0134672), 2015-08-14
Supplement: pone.0134672.s005.pdf [file pone.0134672.s005.pdf]

**S1 Table: Result of karyotyping of eight correctly targeted ES cell clones.**

| Clone ID  | Number of metaphase counted |    |    |    |    |    |    |    |    |    |    |    |    |    |    |    |    |    |    |    |
|-----------|-----------------------------|----|----|----|----|----|----|----|----|----|----|----|----|----|----|----|----|----|----|----|
|           | 1                           | 2  | 3  | 4  | 5  | 6  | 7  | 8  | 9  | 10 | 11 | 12 | 13 | 14 | 15 | 16 | 17 | 18 | 19 | 20 |
| <b>23</b> | 41                          | 41 | 42 | 41 | 41 | 40 | 41 | 40 | 40 | 41 | 40 | 41 | 41 | 42 | 42 |    |    |    |    |    |
| <b>24</b> | 40                          | 40 | 40 | 40 | 40 | 40 | 40 | 40 | 40 | 40 | 40 | 40 | 40 | 40 | 40 | 40 | 40 | 40 | 40 | 40 |
| <b>42</b> | 40                          | 40 | 40 | 40 | 40 | 40 | 40 | 40 | 40 | 40 | 40 | 40 | 40 | 40 | 40 | 40 | 40 | 40 | 40 | 40 |
| <b>62</b> | 39                          | 39 | 39 | 39 | 39 | 39 | 39 | 39 | 39 | 39 | 39 | 39 | 39 | 39 | 39 |    |    |    |    |    |
| <b>71</b> | 40                          | 40 | 40 | 40 | 40 | 40 | 40 | 40 | 40 | 40 | 40 | 40 | 40 | 40 | 40 | 40 | 40 | 40 | 40 | 40 |
| <b>75</b> | 41                          | 41 | 41 | 41 | 41 | 41 | 41 | 41 | 41 | 41 | 41 | 41 | 41 | 41 | 41 |    |    |    |    |    |
| <b>83</b> | 40                          | 40 | 40 | 40 | 40 | 40 | 40 | 40 | 40 | 40 | 40 | 40 | 40 | 40 | 40 | 40 | 40 | 40 | 40 | 40 |
| <b>84</b> | 41                          | 41 | 41 | 41 | 41 | 41 | 41 | 41 | 41 | 41 | 41 | 41 | 41 | 41 | 41 |    |    |    |    |    |
