# Supplementary material for: A Mouse Model for Imprinting of the Human Retinoblastoma Gene
Source: PubMed Central journal article supplement (PMC4537222; doi:10.1371/journal.pone.0134672), 2015-08-14
Supplement: pone.0134672.s006.pdf [file pone.0134672.s006.pdf]

**S2 Table: Chromosomal positions of analyzed regions**

| <b>name</b>         | <b>UCSC browser assembly</b> | <b>position</b>             |
|---------------------|------------------------------|-----------------------------|
| <i>PPP1R26P1</i>    | GRCh37/hg19                  | chr13:48,890,115-48,895,391 |
| <i>Rb1</i> intron 2 | NCBI37/mm9                   | chr14:73,707,316-73,713,900 |
| CpG146              | NCBI37/mm9                   | chr14:73,724,977-73,726,383 |
| CpG42               | GRCh37/hg19                  | chr13:48,890,958-48,891,549 |
| CpG85               | GRCh37/hg19                  | chr13:48,892,636-48,893,857 |
| AluSg               | GRCh37/hg19                  | chr13:48,894,688-48,894,987 |
| E2BAlu              | GRCh37/hg19                  | chr13:48,894,312-48,894,594 |
