# Supplementary material for: A Mouse Model for Imprinting of the Human Retinoblastoma Gene
Source: PubMed Central journal article supplement (PMC4537222; doi:10.1371/journal.pone.0134672), 2015-08-14
Supplement: pone.0134672.s007.pdf [file pone.0134672.s007.pdf]

**S3 Table: Summary of DNA methylation analyses in *PPP1R26P1* heterozygous mice.**

| <b>CGI</b>        | <b>animals</b> | <b>sex</b>           | <b>transmission</b>          | <b>tissues</b>                                                                                                  |
|-------------------|----------------|----------------------|------------------------------|-----------------------------------------------------------------------------------------------------------------|
| <b>146</b>        | 2              | male                 | 1 mat, 1 pat                 | br, eye, li, blood, sperm                                                                                       |
| <b>42</b>         | 4              | 2 male<br>2 female   | 1 mat, 1 pat<br>1 mat, 1 pat | sp, ki, li, lu, he, sk, mu, br, eye, blood,<br>sperm/ovary                                                      |
| <b>mRb1_CpG85</b> | 20             | 10 female<br>10 male | 5 mat, 5 pat<br>5 mat, 5 pat | sp, ki, li, lu, he, sk, mu, br, eye, blood,<br>sperm/ovary in four animals<br>br, ki, sperm/ovary in 16 animals |
| <b>E2BAlu</b>     | 2              | male                 | 1 mat, 1 pat                 | br, eye, li, blood, sperm                                                                                       |
| <b>mRb1_Alusg</b> | 2              | male                 | 1 mat, 1 pat                 | br, eye, li, blood, sperm                                                                                       |

CGI: CpG island analyzed, m, f: male or female; mat, pat: maternal or paternal inheritance of *PPP1R26P1*. Br: brain, li: liver, sp: spleen, ki: kidney, lu: lung, he: heart, sk: skin, mu: skeletal muscle.
