# Supplementary material for: A Mouse Model for Imprinting of the Human Retinoblastoma Gene
Source: PubMed Central journal article supplement (PMC4537222; doi:10.1371/journal.pone.0134672), 2015-08-14
Supplement: pone.0134672.s008.pdf [file pone.0134672.s008.pdf]

**S4 Table: Results of DNA methylation analyses in percent**

| <b>DNA methylation at the <i>Rb1</i> promoter, CpG146</b> |                |                |                |                |                |                |                |                |                |                |
|-----------------------------------------------------------|----------------|----------------|----------------|----------------|----------------|----------------|----------------|----------------|----------------|----------------|
| <b>CpG146</b>                                             | SP18<br>m, mat | SP30<br>m, pat |                |                |                |                |                |                |                |                |
| brain                                                     | 1.0            | 0.9            |                |                |                |                |                |                |                |                |
| eye                                                       | 0.9            | 1.1            |                |                |                |                |                |                |                |                |
| liver                                                     | 0.8            | 0.8            |                |                |                |                |                |                |                |                |
| blood                                                     | 0.8            | 0.9            |                |                |                |                |                |                |                |                |
| sperm                                                     | 0.6            | 0.5            |                |                |                |                |                |                |                |                |
| <b>DNA methylation at CpG42</b>                           |                |                |                |                |                |                |                |                |                |                |
| <b>CpG42</b>                                              | SP18<br>m, mat | SP30<br>m, pat | SP23<br>f, mat | SP35<br>f, pat |                |                |                |                |                |                |
| brain                                                     | 46.3           | 52.2           | 49             | 43.3           |                |                |                |                |                |                |
| eye                                                       | 55.1           | 56.6           | 53.1           | 54.3           |                |                |                |                |                |                |
| liver                                                     | 6.0            | 4.7            | 1.8            | 2.9            |                |                |                |                |                |                |
| blood                                                     | 1.5            | 2.3            | 1.8            | 2.4            |                |                |                |                |                |                |
| ovary / sperm                                             | 7.7            | 14.1           | 20.7           | 5.6            |                |                |                |                |                |                |
| heart                                                     | 7.9            | 5.9            | 8              | 8.9            |                |                |                |                |                |                |
| lung                                                      | 4.2            | 2.8            | 4.3            | 15.9           |                |                |                |                |                |                |
| muscle                                                    | 15.8           | 21.8           | 35.9           | 26             |                |                |                |                |                |                |
| kidney                                                    | 11.3           | 11.9           | 10.5           | 13.6           |                |                |                |                |                |                |
| spleen                                                    | 2.6            | 3.5            | 4.7            | 5.9            |                |                |                |                |                |                |
| skin                                                      | 1.5            | 2.3            | 1.8            | 2.4            |                |                |                |                |                |                |
| <b>DNA methylation at CpG85, females</b>                  |                |                |                |                |                |                |                |                |                |                |
| <b>CpG85</b>                                              | SP23<br>f, mat | SP42<br>f, mat | SP43<br>f, mat | SP60<br>f, mat | SP66<br>f, mat | SP34<br>f, pat | SP35<br>f, pat | SP51<br>f, pat | SP56<br>f, pat | SP74<br>f, pat |
| brain                                                     | 22.7           | 15.9           | 17.3           | 23.2           | 13.3           | 20.8           | 14             | 22.2           | 28.4           | 27.1           |
| eye                                                       | 25.2           |                |                |                |                |                | 29.3           |                |                |                |
| liver                                                     | 0.9            |                |                |                |                |                | 0.8            |                |                |                |
| blood                                                     | 1.4            |                |                |                |                |                | 2.4            |                |                |                |
| ovary                                                     | 7.1            | 3.6            | 7.8            | 5.7            | 6.1            | 5              | 3              | 6.6            | 7.4            | 7.9            |
| heart                                                     | 3.5            |                |                |                |                |                | 1.4            |                |                |                |
| lung                                                      | 0.3            |                |                |                |                |                | 8.1            |                |                |                |
| muscle                                                    | 3.2            |                |                |                |                |                | 2.1            |                |                |                |
| kidney                                                    | 7.6            | 8.8            | 4.8            | 3              | 4.3            | 7.4            | 7.7            | 7.4            | 3.6            | 2.8            |
| spleen                                                    | 3.3            |                |                |                |                |                | 3.4            |                |                |                |
| skin                                                      | 0.6            |                |                |                |                |                | 0.8            |                |                |                |
| <b>DNA methylation at CpG85, males</b>                    |                |                |                |                |                |                |                |                |                |                |
| <b>CpG85</b>                                              | SP18<br>m, mat | SP40<br>m, mat | SP41<br>m, mat | SP59<br>m, mat | SP63<br>m, mat | SP28<br>m, pat | SP29<br>m, pat | SP30<br>m, pat | SP48<br>m, pat | SP69<br>m, pat |
| brain                                                     | 21.5           | 18.9           | 24.7           | 24.9           | 14.7           | 26.3           | 17.5           | 14.1           | 23.7           | 22.1           |
| eye                                                       | 27.2           |                |                |                |                |                |                | 29.3           |                |                |
| liver                                                     | 0.8            |                |                |                |                |                |                | 0.8            |                |                |
| blood                                                     | 1.9            |                |                |                |                |                |                | 1.6            |                |                |
| sperm                                                     | 3.0            | 3.3            | 2.5            | 2.9            | 2              | 2.5            | 1.1            | 0.8            | 2.1            | 1.9            |
| heart                                                     | 1.9            |                |                |                |                |                |                | 3.2            |                |                |
| lung                                                      | 1.1            |                |                |                |                |                |                | 0.9            |                |                |
| muscle                                                    | 2.4            |                |                |                |                |                |                | 2              |                |                |
| kidney                                                    | 5.4            | 7.0            | 7.6            | 6.7            | 7.6            | 6.7            | 8.2            | 10.2           | 6              | 9              |
| spleen                                                    | 3.7            |                |                |                |                |                |                | 3.5            |                |                |
| skin                                                      | 0.9            |                |                |                |                |                |                | 1.3            |                |                |

| <b>DNA methylation at E2BAlu and AluSg</b>            |                |                |                |                |              |              |              |  |  |
|-------------------------------------------------------|----------------|----------------|----------------|----------------|--------------|--------------|--------------|--|--|
|                                                       | <b>E2BAlu</b>  |                | <b>AluSg</b>   |                |              |              |              |  |  |
|                                                       | SP18           | SP30           | SP18           | SP30           |              |              |              |  |  |
|                                                       | m. mat         | m. pat         | m. mat         | m. pat         |              |              |              |  |  |
| brain                                                 | 67.2           | 58.4           | 85.7           | 86.4           |              |              |              |  |  |
| eye                                                   | 56.9           | 67.7           | 63.7           | 65             |              |              |              |  |  |
| liver                                                 | 24.4           | 17.6           | 46.8           | 38.9           |              |              |              |  |  |
| blood                                                 | 40.8           | 43.9           | 74.1           | 61             |              |              |              |  |  |
| sperm                                                 | 16.7           | 29.1           | 40.4           | 39.5           |              |              |              |  |  |
| <b>DNA methylation in oocytes and sperm</b>           |                |                |                |                |              |              |              |  |  |
| <b>sperm</b>                                          |                | <b>CpG14</b>   | <b>CpG42</b>   | <b>CpG8</b>    | <b>E2BAI</b> | <b>AluSg</b> | <b>Snrpn</b> |  |  |
| SP18                                                  | mat            | 0.6            | 7.7            | 3              | 16.7         | 40.4         | 49.6         |  |  |
| SP40                                                  | mat            |                |                | 3.3            |              |              | 61.4         |  |  |
| SP41                                                  | mat            |                |                | 2.5            |              |              |              |  |  |
| SP59                                                  | mat            |                |                | 2.9            |              |              |              |  |  |
| SP63                                                  | mat            |                |                | 2              |              |              |              |  |  |
| SP220                                                 | mat            |                | 4.5            | 0.9            |              | 26.7         | 26.7         |  |  |
| SP28                                                  | pat            |                |                | 2.5            |              |              | 58.6         |  |  |
| SP29                                                  | pat            |                |                | 1.1            |              |              |              |  |  |
| SP30                                                  | pat            | 0.5            | 14.1           | 0.8            | 29.1         | 39.5         | 58.6         |  |  |
| SP48                                                  | pat            |                |                | 2.1            |              |              |              |  |  |
| SP69                                                  | pat            |                |                | 1.9            |              |              |              |  |  |
| SP193                                                 | pat            |                | 2.6            | 1.7            |              | 18.2         | 7.5          |  |  |
| SP132                                                 | mat/pat        |                | 0.7            | 1.1            |              | 1.9          | 0.9          |  |  |
| SP141                                                 | mat/pat        |                | 2.2            | 1.2            |              | 15.7         | 14.0         |  |  |
|                                                       |                |                |                |                |              |              |              |  |  |
| <b>oocytes</b>                                        |                |                |                |                |              |              |              |  |  |
| SP233                                                 | mat            |                |                | 1.4            |              | 12.8         | 22.5         |  |  |
| SP162                                                 | mat            |                |                | 0.9            |              | 25.6         | 83.4         |  |  |
| SP232                                                 | mat            |                |                | 6.5            |              | 3.5          | 61.8         |  |  |
| SP165                                                 | pat            |                |                | 0.4            |              | 9.1          | 43.3         |  |  |
| SP99                                                  | pat            |                |                | 4.7            |              | 10.9         | 75.8         |  |  |
| SP215                                                 | pat            |                |                | 3.4            |              | 14.1         | 47.7         |  |  |
| SP207                                                 | mat/pat        |                |                | 0.5            |              | 0.4          | 1.5          |  |  |
| SP237                                                 | mat/pat        |                |                | 3.6            |              | 12.5         | 93.9         |  |  |
| SP228                                                 | mat/pat        |                |                | 0.3            |              | 0.3          | 0.4          |  |  |
| <b>DNA methylation at CpG85 in homozygous animals</b> |                |                |                |                |              |              |              |  |  |
| <b>CpG85</b>                                          | SP132<br>m     | SP141<br>m     | SP174<br>f     | SP228<br>f     | SP22<br>f    |              |              |  |  |
| Blood                                                 | 1.9            | 1.1            | 1.8            | 1.5            | 1.5          |              |              |  |  |
| Brain                                                 | 27             | 31.7           | 48.9           | 12.8           | 21.4         |              |              |  |  |
| kidney                                                | 8.9            | 7              | 6.9            | 7              | 5.8          |              |              |  |  |
| Sperm/ovary/o                                         | 1.1            | 1.2            | 4              |                |              |              |              |  |  |
| <b>DNA methylation at Snrpn on chromosome 7C</b>      |                |                |                |                |              |              |              |  |  |
|                                                       | SP23<br>f. mat | SP35<br>f. pat | SP18<br>m. mat | SP30<br>m. pat |              |              |              |  |  |
| brain                                                 | 50.2           | 53.4           | 48.3           | 67.0           |              |              |              |  |  |
| ovary, sperm                                          | 54.5           | 46.6           | 49.6           | 28.0           |              |              |              |  |  |

m, f: male or female; mat, pat: maternal or paternal transmission of *PPP1R26P1*; SPxx: identification numbers of mice.
